# Supplementary material for: Mineral Content and Volatile Profiling of Prunus avium L. (Sweet Cherry) By-Products from Fundão Region (Portugal)
Source: MDPI journal article supplement (doi:10.3390/foods11050751), 2022-03-04
Supplement: s1 [file s1]

**Table S1.** Limits of detection (LOD) and limits of quantification (LOQs) for the analyzed elements.

| Element | LOD (µg/L) | LOQ (µg/L) |
|---------|------------|------------|
| Al      | 1.92       | 6.40       |
| As      | 0.033      | 1.09       |
| Ba      | 0.05       | 0.17       |
| Cd      | 0.03       | 0.10       |
| Co      | 0.04       | 0.15       |
| Cr      | 0.14       | 0.45       |
| Cu      | 0.42       | 1.39       |
| Fe      | 11.04      | 36.81      |
| Li      | 0.01       | 0.03       |
| Mn      | 0.06       | 0.21       |
| Na      | 23.08      | 76.86      |
| Ni      | 0.87       | 2.90       |
| Pb      | 0.06       | 0.21       |
| Rb      | 0.13       | 0.42       |
| Se      | 0.25       | 0.84       |
| Sr      | 0.10       | 0.33       |
| Zn      | 0.79       | 2.61       |
